# Supplementary material for: Variable recombination dynamics during the emergence, transmission and ‘disarming’ of a multidrug-resistant pneumococcal clone
Source: PubMed Central journal article supplement (PMC4094930; doi:10.1186/1741-7007-12-49), 2014-06-23

Figure S4

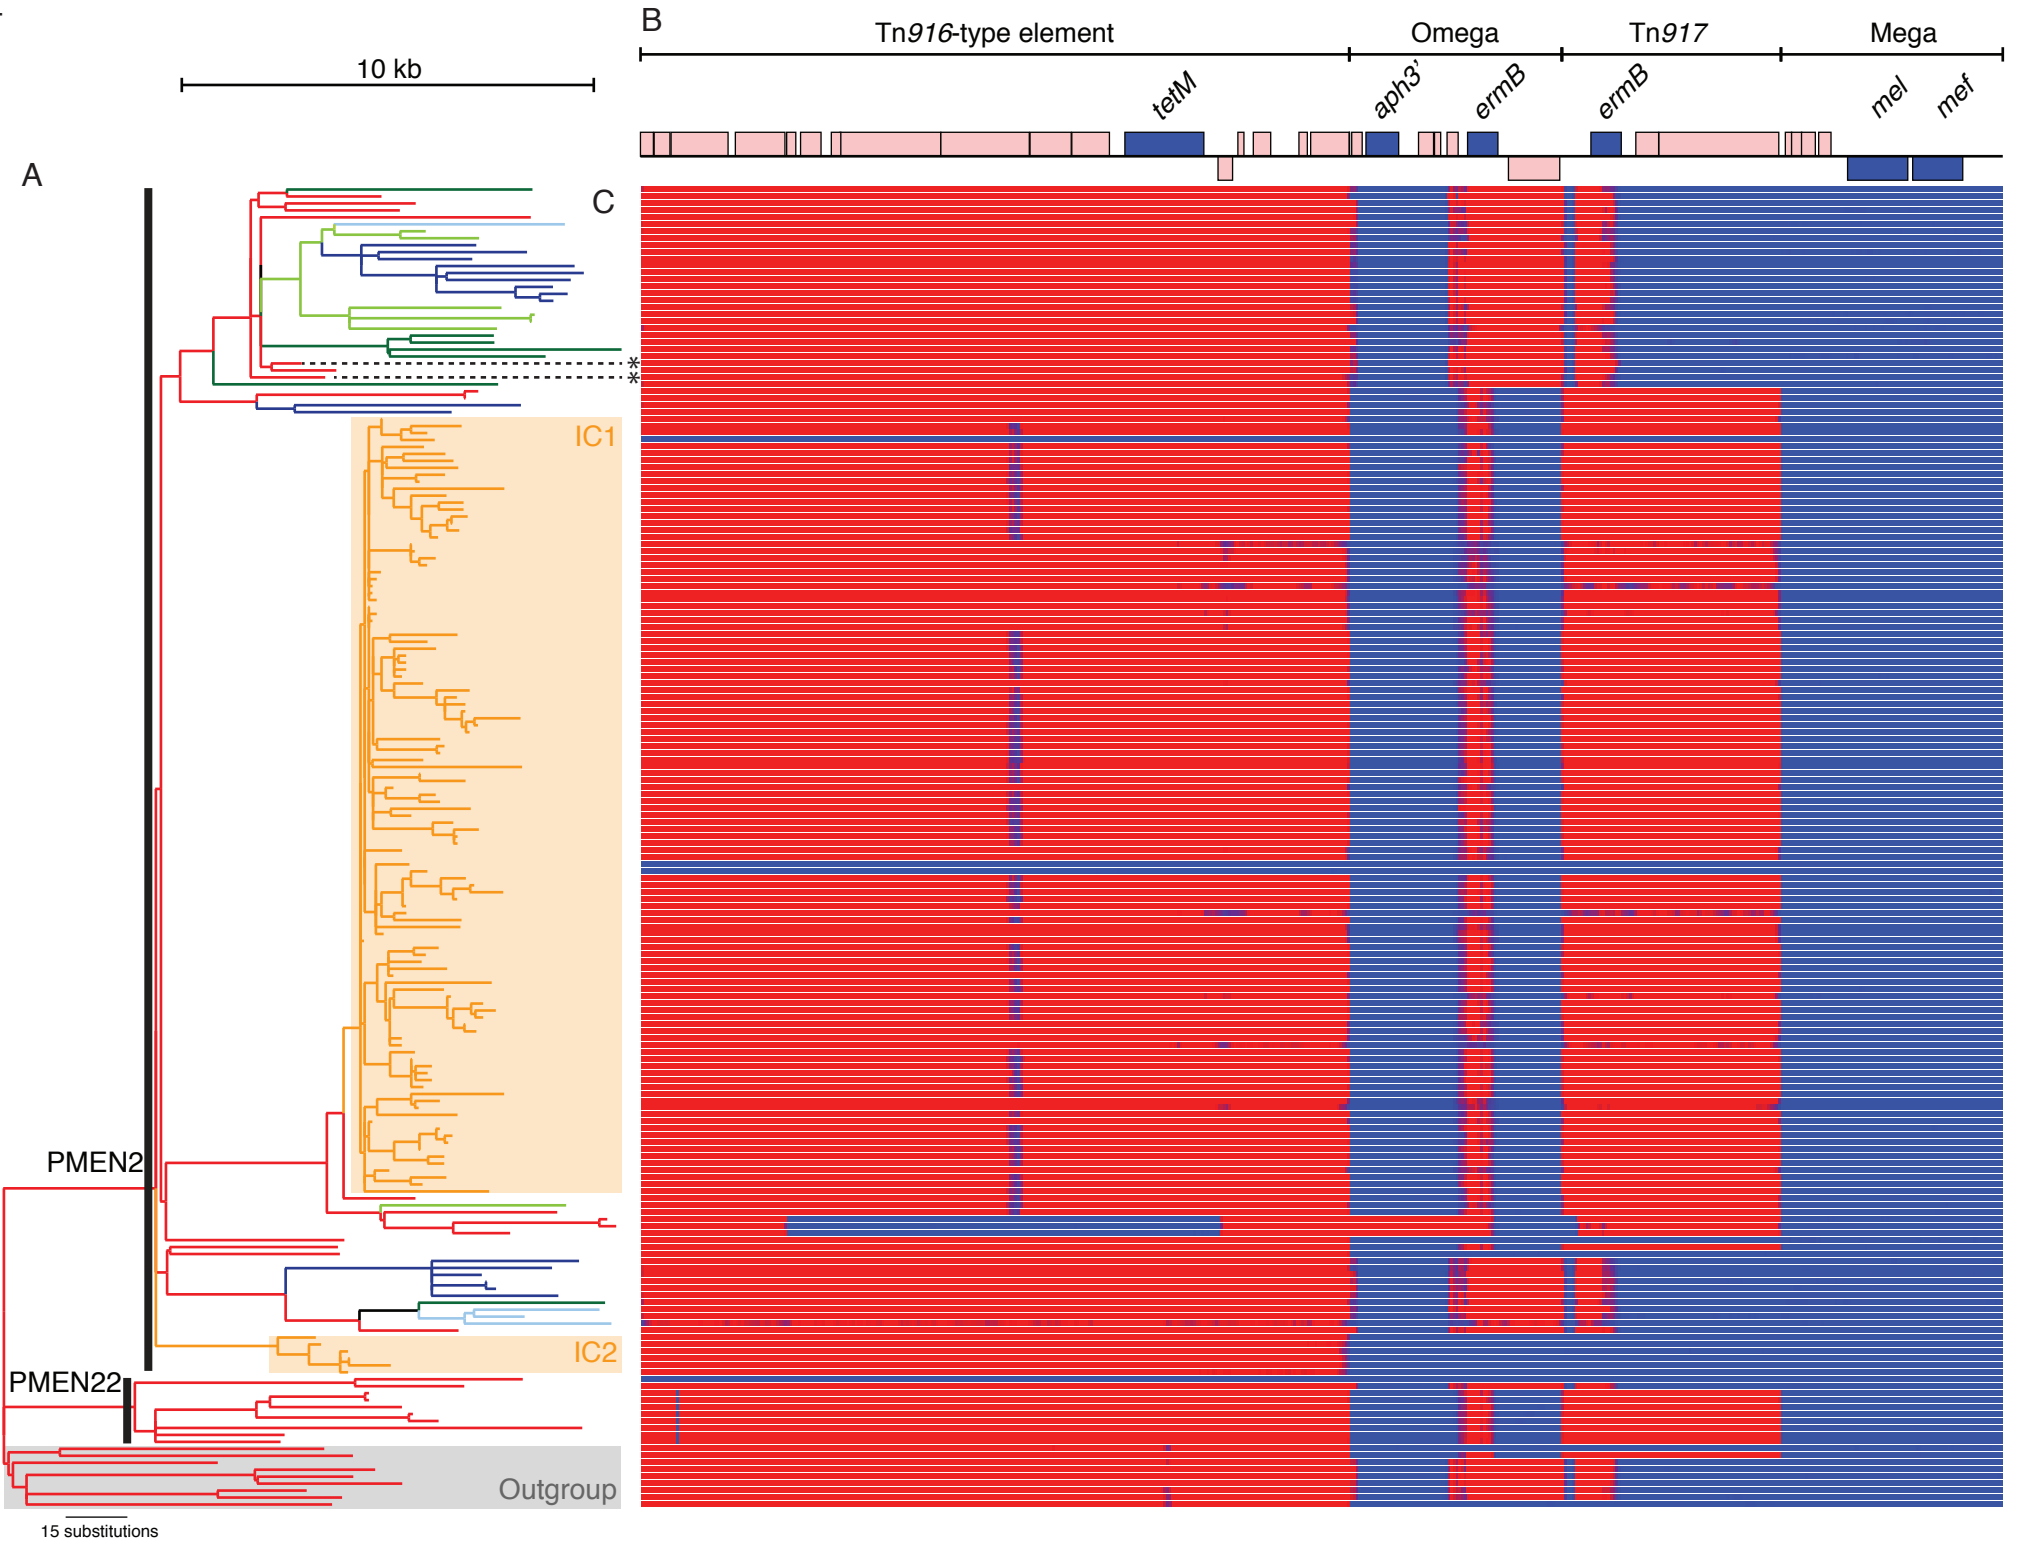

Supplement: 1741-7007-12-49-S5.pdf [file 1741-7007-12-49-S5.pdf]
